# Supplementary material for: The TRPM1 channel in ON-bipolar cells is gated by both the α and the βγ subunits of the G-protein Go
Source: PubMed Central journal article supplement (PMC4756708; doi:10.1038/srep20940), 2016-02-17
Supplement: srep20940-s1.pdf [file srep20940-s1.pdf]

# The TRPM1 channel in ON-bipolar cells is gated by both the $\alpha$ and the $\beta\gamma$ subunits of the G-protein $G_o$

Ying Xu(徐颖)<sup>1,5</sup>, Cesare Orlandi<sup>2</sup>, Yan Cao<sup>2</sup>, Shengyan Yang (杨昇炎)<sup>1</sup>, Chan-II Choi<sup>3</sup>, Vijayakanth Pagadala<sup>3</sup>, Lutz Birnbaumer<sup>3</sup>, Kirill A. Martemyanov<sup>2</sup>, Noga Vardi<sup>4</sup>

## Supplementary Figures

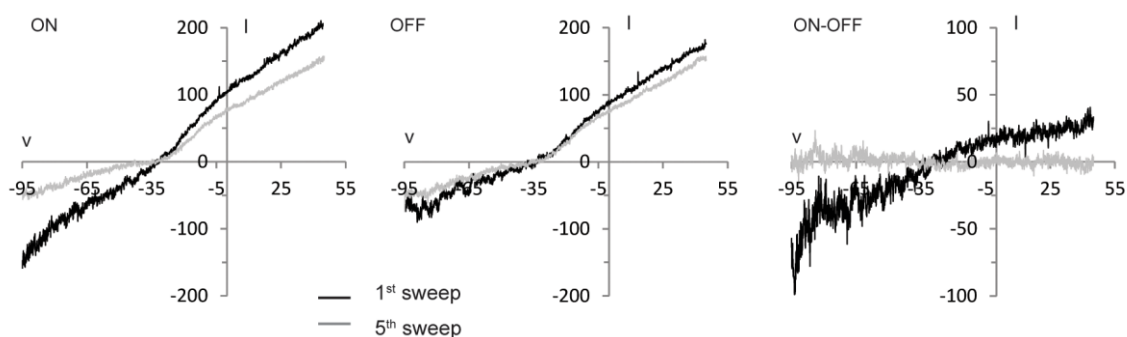

**Supplementary figure 1. Only TRPM1 is closed by myrG $\alpha_o$ -QL.** An example of I-V curves taken from a cell dialyzed with G $\alpha_o$ -QL for the 1<sup>st</sup> and 5<sup>th</sup> sweeps during light ON (left) and during light OFF (middle). The difference between the curves during light ON and OFF (right) gives the contribution of TRPM1. Note that at the 1<sup>st</sup> sweep (black), TRPM1 has a significant conductance while at the 5<sup>th</sup> sweep (gray), the curve is flat, indicating TRPM1 is closed.

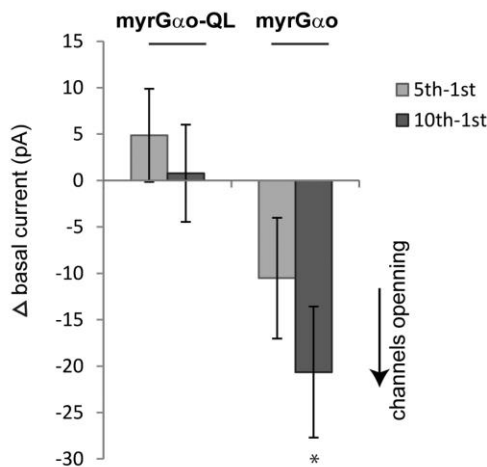

**Supplementary figure 2. Under dark-adaptation, 40 nM myrG $\alpha_o$ , but not 40 nM myrG $\alpha_o$ -QL, increases the holding current.** Plotted are the differences between the basal currents at the 5<sup>th</sup> time point minus that in the first (light gray) and that between the 10<sup>th</sup> time point and the 1<sup>st</sup> time point (darker gray) for WT myrG $\alpha_o$  (right bars) and the mutated active form (left bars). When channels are opening, the inward current increases (has a more negative value) giving negative values. For WT the difference increased with time, but for QL it remained practicably the same.
